# Supplementary material for: Donor DNA Utilization During Gene Targeting with Zinc-Finger Nucleases
Source: Oxford University Press journal article supplement (doi:10.1534/g3.112.005439), 2013-03-28
Supplement: 005439_figures3.pdf [file 005439_figures3.pdf]

**A**

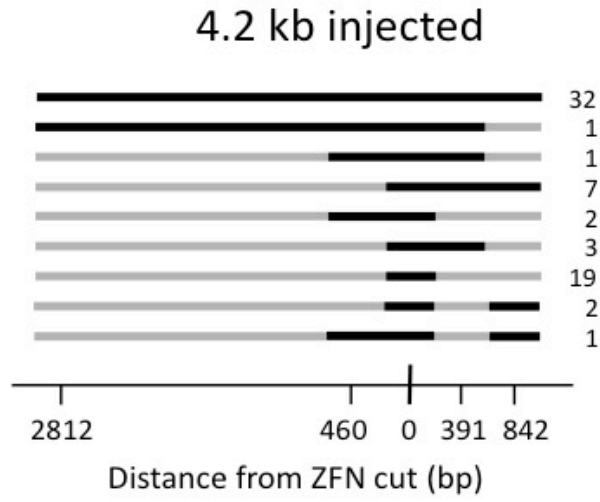

**B**

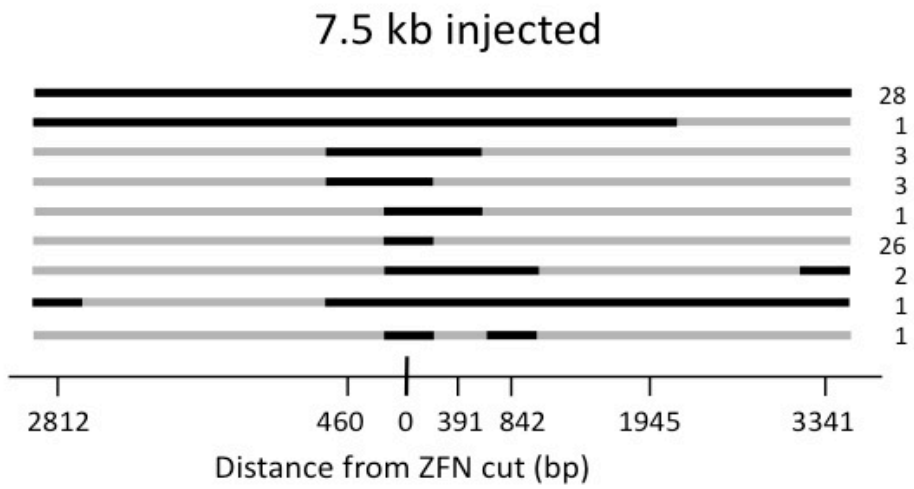

**C**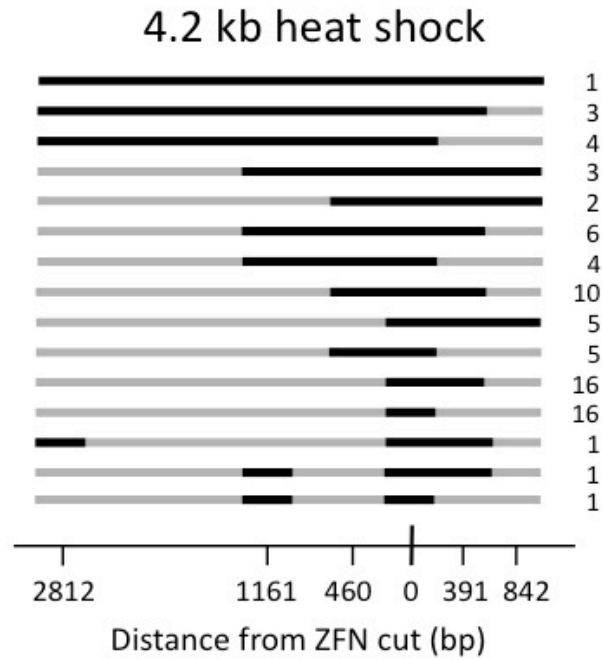

**Figure S3** Diagrams of individual conversion tracts from the experiments summarized in Figures 3C and 4. **A**, tracts from injection of the 4.2-kb donor. **B**, tracts from injection of the 7.5-kb donor. **C**, tracts from the HS experiment with the 4.2-kb donor. In each panel the sites assayed and their distance from the ZFN cut are indicated at the bottom. Black bars show the extent of donor sequence found in the HR products; gray bars show remaining target sequence. The number of instances is given at the right of each tract type.
