# Supplementary material for: Donor DNA Utilization During Gene Targeting with Zinc-Finger Nucleases
Source: Oxford University Press journal article supplement (doi:10.1534/g3.112.005439), 2013-03-28
Supplement: 005439_figures4.pdf [file 005439_figures4.pdf]

WT sequence

TTGGATATCACCCGAAACGAATCCCAATGCTCGCACCTAT**AGCTACTACACGAATGGC**  
**GTGGG**AGTCACTGTGGTAGAGATCGATTGCCTGACTGGCGACCATCAGGTGCT

Oligo A

TTGGATATCACCCGAAACGAATCCCAATGCTCGCACCTAT**TGATAATCTAGA**AGTCAC  
TGTGGTAGAGATCGATTGCCTGACTGGCGACCATCAGGTGCT

Oligo B

TTGGATATCACCCGAAACGAATCCCAATGC**C**CGCACCTAT**AGCTACTACAC** AATGGC  
**GTGGG**AGTCACTGTGGTAGAGATCGATTGCCTGACTGGCGACCATCAGGTGCT

Oligo F

*Eco*RI

TTGGATATCACCCGAAAC**GAATTC**CAATGC**C**CGCACCTAT**AGCTACTACAC** AATGGC  
**GTGGG**AGTCACTGTGGTAG**CGATCG**ATTGCCTGACTGGCGACCATCAGGTGCT

*Pvu*I

Oligo R

AGCACCTGATGGTCGCCAGTCAGGCAAT**CGATCG**CTACCACAGTGACT**CCCACGCCATT**  
**GTGTAGTAGCT**ATAGGTGCG**G**GCATT**GAA**TT**CGTTTCCGGGTGATATCCAA**

**Figure S4** Sequences of oligonucleotides used as donors. Each sequence starts at the 5' end. The ZFN target is highlighted in bold blue type; the sequence that replaces it in Oligo A is in bold green type. The underlined space in Oligos B, F, and R shows the site of a single nucleotide deletion. The substitutions in Oligos F and R are shown in red, and the restriction enzyme recognition sites created by two of them (identified for Oligo F) are in bold type. One additional polymorphism in B, F and R is shown in red and underlined. Oligo R is the complement of Oligo F.
