# Supplementary material for: Donor DNA Utilization During Gene Targeting with Zinc-Finger Nucleases
Source: Oxford University Press journal article supplement (doi:10.1534/g3.112.005439), 2013-03-28
Supplement: 005439_tables1.pdf [file 005439_tables1.pdf]

**Table S1 Oligonucleotides used in this study (see also Figure S5).**

| Oligo name    | DNA sequence (5'→3')               | Used in                                                                                                             |
|---------------|------------------------------------|---------------------------------------------------------------------------------------------------------------------|
| ry-PvuI-F     | CAAGGCGTATTTTCGATCGGGTCAGCC        | 0.2-kb donor construction<br>AA, BX deletion detection                                                              |
| ry-9350-R     | AATAGCCGGATTTCAGGCTAGAGC           | 0.2-kb donor construction                                                                                           |
| ry-8981-F     | CGGAAACGGCCACGGATAAAGTA            | 0.5-kb donor construction                                                                                           |
| ry-9532-R     | GTAGGCTGACATTGAACTCCCCG            | 0.5-kb donor construction                                                                                           |
| ry-8788-F     | AATCGGGAGAATCGCTGGCGGAAAC          | 1.0-kb donor construction                                                                                           |
| ry-9720-R     | GCAATTCGAATGCGTGCCGATGTGG          | 1.0-kb donor construction<br><i>KpnI</i> site polymorphism                                                          |
| ry-genomic-R  | GCGAAGATCTCGTCTCATAACCTGAG         | AA deletion detection<br>SA deletion detection<br><i>HaeIII</i> site polymorphism<br><i>DpnII</i> site polymorphism |
| ry-10320-R    | ACACACTTACCAATCAGCGGACG            | BX deletion detection                                                                                               |
| ry-506-7640-F | CACCAGCTCGTGGAGCGCGTG              | BP deletion detection                                                                                               |
| ry-PvuI-R     | GGCTGACCCGATCGAAATACGCCTTG         | BP deletion detection                                                                                               |
| ry-NdeI-F     | GGAAAATCCATATGTAGGTTTCTTTATGCATACC | SA deletion detection                                                                                               |
| ry-9085-F     | GGAATGGCCGTACTGGATGCGTG            | <i>HaeIII</i> site polymorphism<br><i>DpnII</i> site polymorphism                                                   |
| ry-EcoRI-F    | GAGCGCAGCGAATTCAGCCCTTG            | <i>PvuII</i> site polymorphism                                                                                      |
| ry-1460-R     | CCGAGCGGCTCTTTGGGCC                | <i>PvuII</i> site polymorphism                                                                                      |
| ry-BstNI-F    | CACCAAGCTGGATGCCAGTGAAG            | <i>BstNI</i> site polymorphism                                                                                      |
| ry-NdeI-R     | GGTATGCATAAAGAAACCTACATATGGATTTTCC | <i>BstNI</i> site polymorphism                                                                                      |
| ry-6000-F     | GTGGGCTTCACCAAGGAGGGTC             | <i>KpnI</i> site polymorphism                                                                                       |
| ry-842-FLP-F  | 5HEX/CCTTTTAGATTAAGAAAAATTCATGG    | <i>HaeIII</i> site polymorphism                                                                                     |
| ry-842-FLP-R  | TTCATCGGAAAACCTTGCTCA              | <i>HaeIII</i> site polymorphism                                                                                     |
| ry-1985-FLP-F | 56-FAM/CCATAACGGCAGCACACTG         | Polymorphism at +195                                                                                                |
| ry-1985-FLP-R | CTCAACGCCACCAATCAA                 | Polymorphism at +195                                                                                                |

The last 4 entries were used in assays by high-resolution length analysis of the PCR products, and the forward primer (F) carried a fluorescent label in each case.
